# Supplementary material for: Functional oligo(vinyl acetate) bearing bipyridine moieties by RAFT polymerization and extraction of metal ions in supercritical carbon dioxide
Source: Royal Society of Chemistry journal article supplement (doi:10.1039/c3py00212h), 2013-01-01
Supplement: c3py00212h.pdf [file c3py00212h.pdf]

## Functional Oligo(vinyl acetate) Bearing Bipyridine Moieties by RAFT Polymerization and Extraction of Metal Ions in Supercritical Carbon Dioxide

Shoucun Zhang,<sup>a</sup> Yali Luo,<sup>a</sup> Hongwei Yang,<sup>b</sup> Hai-Jian Yang<sup>b</sup> and Bien Tan<sup>a\*</sup>

### Supporting information

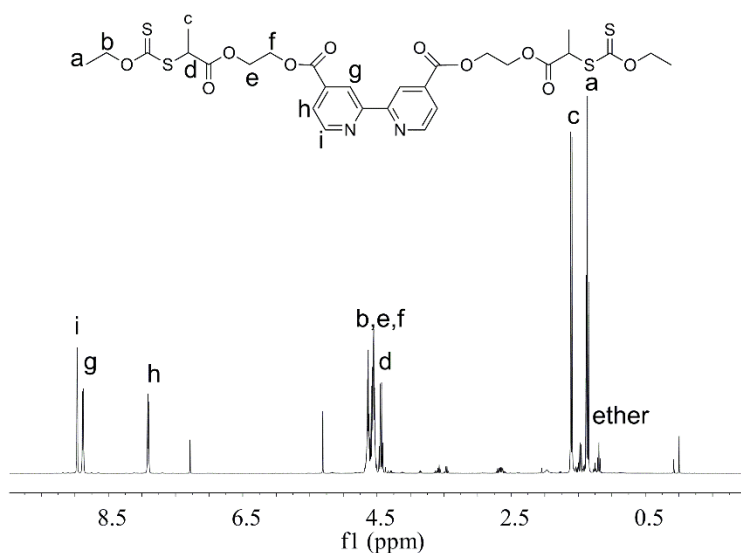

**Fig. S1** <sup>1</sup>H NMR (CDCl<sub>3</sub>) Spectra of X-bpy-X

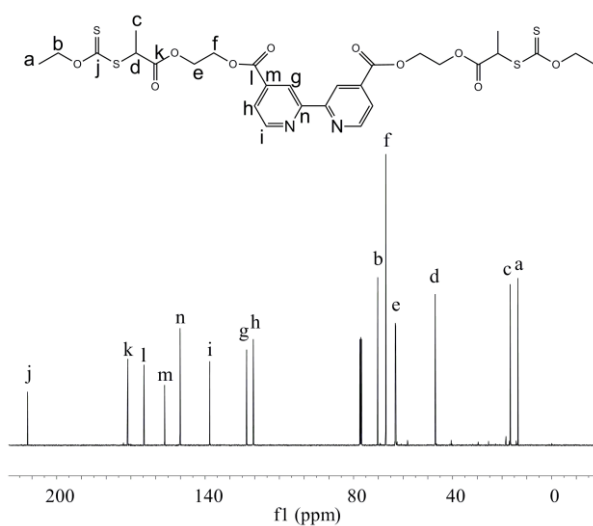

**Fig. S2** <sup>13</sup>C NMR (CDCl<sub>3</sub>) Spectra of X-bpy-X

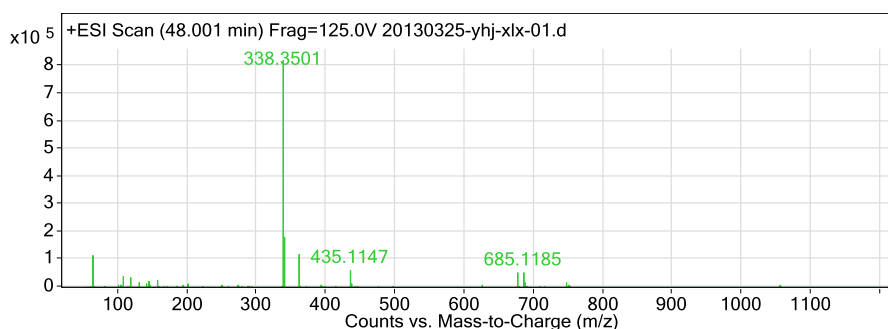

**Fig. S3** HRMS (ESI+) spectrum of the X-bpy-X RAFT agent

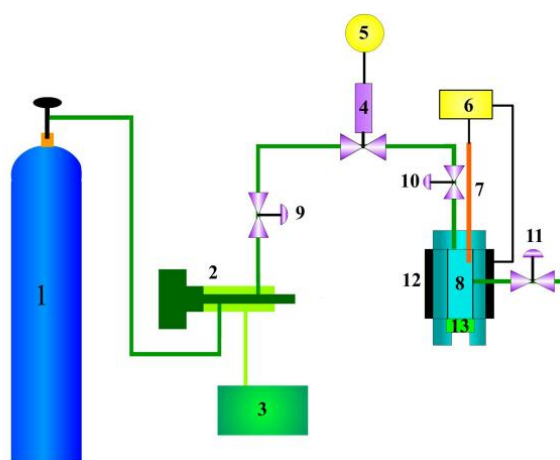

**Fig. S4** Schematic of Solubility equipment (1, cylinder, 2, CO<sub>2</sub> syringe pump, 3, cooling bath, 4, digital pressure transducer; 5, pressure gauge, 6, temperature controller, 7, thermocouple, 8, autoclave, 9, 10, 11, valve, 12, heating tape, 13, view windows (sapphire)).

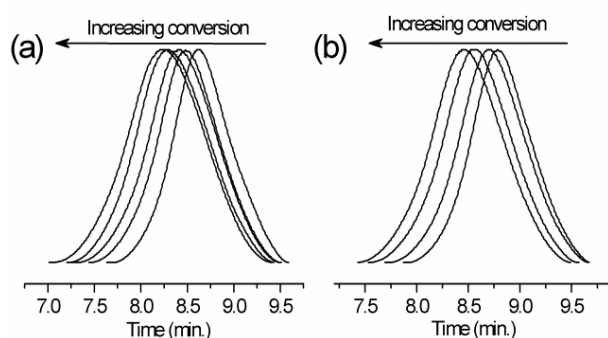

**Fig. S5** GPC traces of OVAc-bpy formed in the presence of X-bpy-X (a) VAc/X-bpy-X/AIBN = 110/1/0.4, (b) VAc/X-bpy-X/AIBN = 110/1/0.2 in 50% (w/w) THF at 65 °C.
